# Supplementary material for: Increased Rapid Eye Movement Sleep Is Associated With a Reduced Risk of Heart Failure in Middle-Aged and Older Adults
Source: PubMed Central journal article supplement (PMC9001949; doi:10.3389/fcvm.2022.771280), 2022-03-29

Supplementary Figure 1. Flow diagram of participant selection

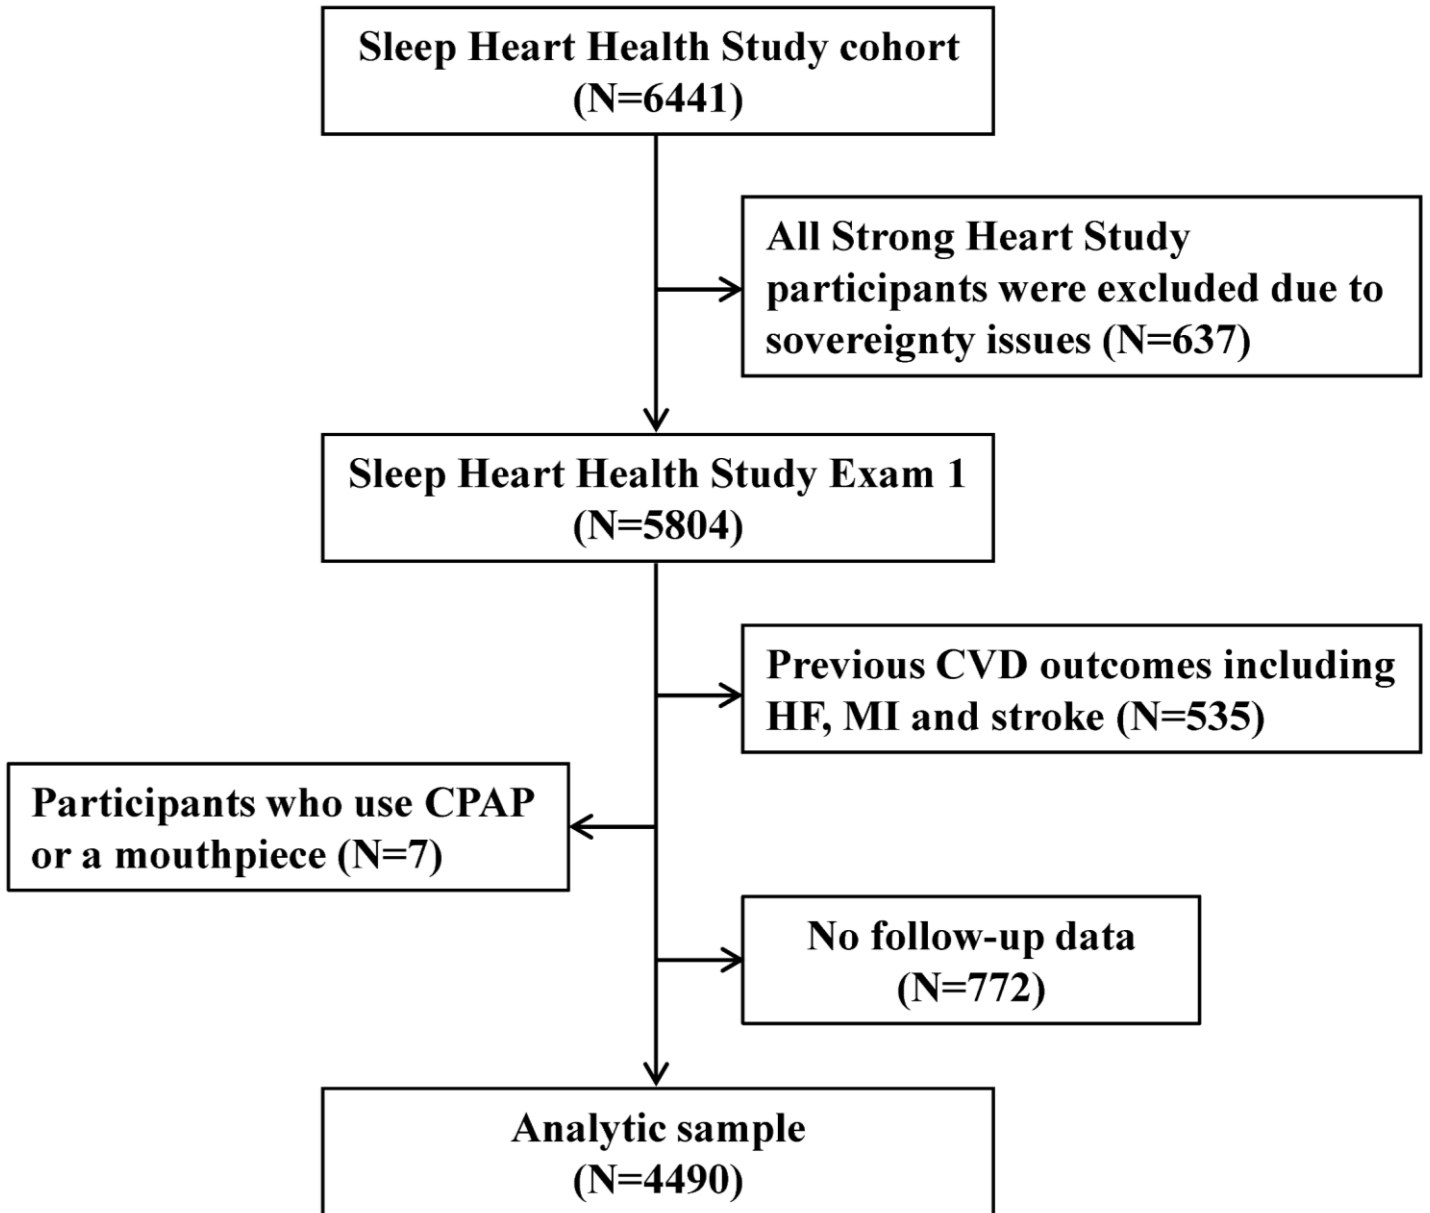

Supplement: Image_1.pdf [file Image_1.pdf]
